# Supplementary material
Source: PubMed Central journal article supplement (PMC4129664)
Supplement: Supp_Fig1.pdf [file Supp_Fig1.pdf]

# Supplementary Data

## CONSORT Flow Diagram

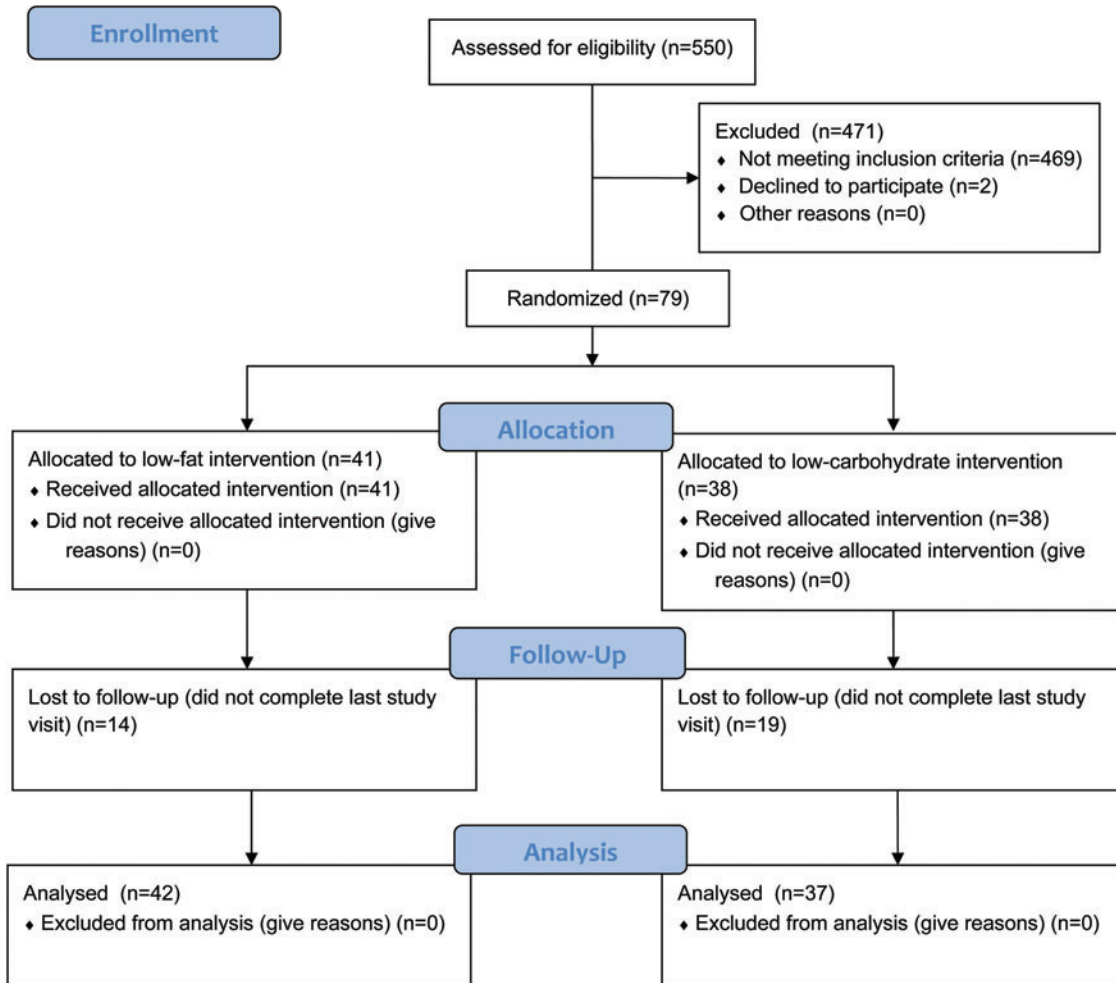

**SUPPLEMENTARY FIG. S1.** Consolidated Standards of Reporting Trials (CONSORT) for the Lifestyle Eating and Fitness Study.
